# Supplementary material for: Genetic diversity of SARS-CoV-2 infections in Ghana from 2020-2021
Source: PubMed Central journal article supplement (PMC9076825; doi:10.1038/s41467-022-30219-5), 2022-05-06
Supplement: 41467_2022_30219_MOESM1_ESM.pdf [file 41467_2022_30219_MOESM1_ESM.pdf]

## Table of Contents

|                                                                                                                                                           |          |
|-----------------------------------------------------------------------------------------------------------------------------------------------------------|----------|
| <b>Supplementary Methods</b> .....                                                                                                                        | <b>2</b> |
| Sample selection and processing .....                                                                                                                     | 2        |
| Reverse transcription and Multiplex PCR .....                                                                                                             | 2        |
| Library preparation .....                                                                                                                                 | 2        |
| Sequencing .....                                                                                                                                          | 3        |
| Data Analysis.....                                                                                                                                        | 3        |
| <b>Supplementary Tables</b> .....                                                                                                                         | <b>4</b> |
| Supplementary Table 1: The frequency of all the lineages in 1573 samples sequenced in Ghana from June 2020 to September 2021. ....                        | 4        |
| Supplementary Table 2: Ghana Population in 2021 (Census) by region and sex, confirmed cases and number of samples sequenced. ....                         | 5        |
| Supplementary Table 3: Demographic characteristics of community study participants (1002/1123) .....                                                      | 6        |
| Supplementary Table 4: Frequency of SARS-CoV-2 variants among travellers arriving in Ghana from other countries in January, March, and June (n=121). .... | 7        |
| Supplementary Table 5: The proportion of Delta sub-lineages (AY) Variants in Ghana. ....                                                                  | 8        |

## Supplementary Methods

### Sample selection and processing

Samples confirmed as SARS-COV-2 positive by Real-Time PCR were selected for genome sequencing. Viral RNA from nasopharyngeal and oropharyngeal samples was extracted using the QIAmp Viral RNA extraction kit (Qiagen, Hilden, Germany). The extracted total RNA concentration was measured using Qubit™ RNA HS Assay Kit on a Qubit 4 Fluorometer (ThermoFisherScientific™ USA). The integrity and quality of RNA were checked using the Agilent RNA 6000 Nano Kit on the Bioanalyzer (Agilent™ Tech. Inc. CA USA). The ARTIC loCost protocol (<https://artic.network/ncov-2019>) was used for sequencing as follows with some minor adjustments.

### Reverse transcription and Multiplex PCR

The extracted RNA was converted into cDNA using 2µL of the LunaScript® RT SuperMix (New England Biolabs, UK) and 8 µL of RNA. cDNA synthesis reactions were incubated at 25°C for 2 minutes, 55°C for 10 minutes, 95°C for 1 minute and a final hold at 4°C. The ARTIC SARS-CoV-2 Amplicon Panel V3 primers were used for multiplex tiled PCR to generate overlapping amplicons from the cDNA. Two sets of PCR reactions using each primer pool were set as follows; 12.5 µL Q5 Hot Start High-Fidelity 2X Master Mix (New England Biolabs, UK), 4 µL V3 Pool 1 or 2 (10µM) (IDT, USA, cat# 10006788), 6 µL Nuclease-free water and 2.5 µL of the cDNA as template. Cycling conditions for the PCR reaction were set as follows; 98 °C for 30 s, followed by 38 cycles of 98 °C for 15 s and 65 °C for 5 min and a final hold at 4 °C. The PCR products were then run on a gel and only the samples with a visible band were selected for sequencing.

### Library preparation

Sequencing libraries were prepared by first combining the amplicons from pools 1 and 2 for each sample and subsequently diluting them at a ratio of 1:10 with nuclease-free water. End preparation was carried out using 3.3 µL of the PCR dilution, 1.2 µL of NEBNext Ultra II End prep reaction buffer, 0.5 µL NEBNext Ultra II End prep enzyme mix (New England Biolabs, UK) and 5 µL nuclease-free water. The mixture was then incubated at 20 °C for 15 minutes, 65 °C for 15 mins and on ice for 1 min. The end prepped Amplicons were then taken through a native barcoding step as follows using either the Ultra II Ligation Module or the Blunt/TA Ligase Master Mix (New England Biolabs, UK); 2.5 µL of the End-preparation reaction mixture, 10 µL of Ultra II Ligation Module master mix (New England Biolabs, UK), 0.3 µL of Ultra II Ligation Module Enhancer (New England Biolabs, UK), 2.5 µL of one of the EXP-NBD196 barcodes was added to each sample (Oxford Nanopore Technologies, UK) and topped up to 20 µL with nuclease-free water. For the Blunt/TA Ligase option, 5µL of Blunt/TA Ligase was added to 1.5 µL of the end-preparation reaction mixture and 1.25 µL of one of the EXP-NBD196 barcodes was added to each sample (Oxford Nanopore Technologies, UK) and finally topped up to 10 µL with Nuclease free water. Barcoding reactions were incubated at 20 °C for 20 minutes, 65 °C for 10 mins and on ice

for 1 min. The barcoded amplicons were then pooled and purified using 0.6X Ampure XP beads (Beckman Coulter) with two 250 µL of SFB (Oxford Nanopore Technologies, UK) washes and a final 200 µL 80% ethanol wash and finally eluted in 35 µL of EB (Oxford Nanopore Technologies, UK). The purified pooled barcoded library was quantified using the Qubit™ DNA HS Assay Kit (Thermo Fisher Scientific, USA) with about 75 ng of barcoded libraries ligated to the AMII sequencing adapters(Oxford Nanopore Technologies, UK) as follows; 5 µL Adapter Mix (AMII) (Oxford Nanopore Technologies, UK), 10µL of NEBNext Quick Ligation Reaction Buffer (5X) and 5 µL of Quick T4 DNA ligase (New England Biolabs, UK) were added to 30 µL of the pooled bar-coded library and incubated at room temperature for 20 mins. The adapter-ligated library was then purified using 0.6X Ampure XP beads (Beckman Coulter) with two 250 µL OF SFB (Oxford Nanopore Technologies, UK) and finally eluted in 15 µL of EB (Oxford Nanopore Technologies, UK).

### **Sequencing**

The purified adapter ligated library was quantified using the Qubit™ RNA HS Assay Kit on a Qubit 4 Fluorometer (ThermoFisherScientific™ USA) and about 20 ng was loaded on an R9.4.1 flow cell (FLO-MIN106) for sequencing. The sequencing was carried out using a MinION Mk1b or Mk1c device (Oxford Nanopore Technologies, UK). Our previously published data from March to May 2020 were included in the study to help provide continuity to SARS-Cov-2 genomic epidemiology in Ghana.

### **Data Analysis**

The QGIS Geographic Information System (QGIS software version 3.22.5; <http://www.qgis.org>) was used to compute the population density (i.e. population size/area[in hectares]) of each region based on the Population and Housing Census data obtained from the Ghana Statistical Service (GSS) (<https://www.statsghana.gov.gh>). The data was projected on a map downloaded as a shape file from the <https://data.gov.gh/dataset/shapefiles-all-districts-ghana-2012-216-districts>.

## Supplementary Tables

**Supplementary Table 1: The frequency of all the lineages in 1573 samples sequenced in Ghana from June 2020 to September 2021.**

| <b>Variant</b>             | <b>Local</b> | <b>Traveller</b> | <b>Total</b> |
|----------------------------|--------------|------------------|--------------|
| B.1.617.2 (Delta Lineages) | 490          | 8                | 498          |
| B.1.1.7 (Alpha)            | 222          | 48               | 270          |
| B.1.1.318                  | 206          | 4                | 210          |
| B.1.525 (Eta)              | 166          | 15               | 181          |
| B.1.1                      | 101          | 7                | 108          |
| A.27                       | 71           | 1                | 72           |
| B.1.1.359                  | 55           | 1                | 56           |
| A                          | 30           | 0                | 30           |
| B.1                        | 22           | 5                | 27           |
| B.1.623                    | 26           | 0                | 26           |
| B.1.351 (Beta)             | 5            | 7                | 12           |
| B.1.1.485                  | 9            | 0                | 9            |
| B.1.1.409                  | 6            | 1                | 7            |
| B.1.1.61                   | 5            | 0                | 5            |
| Other Variants             | 39           | 23               | 62           |
| <b>Grand Total</b>         | <b>1453</b>  | <b>120</b>       | <b>1573</b>  |

**Supplementary Table 2: Ghana Population in 2021 (Census) by region and sex, confirmed cases and number of samples sequenced.**

(<https://www.ghs.gov.gh/covid19/dashboardm.php>), and (<http://www.statsghana.gov.gh>)

| Region        | Total Population  |                   |                   | COVID-19 Cases |              |
|---------------|-------------------|-------------------|-------------------|----------------|--------------|
|               | Both Sexes        | Male              | Female            | Cases          | Sequenced    |
| <b>Ghana</b>  | <b>30,792,608</b> | <b>15,182,459</b> | <b>15,610,149</b> | <b>135,256</b> | <b>1,077</b> |
| Greater Accra | 5,446,237         | 2,674,192         | 2,772,045         | 83,381         | 465          |
| Ashanti       | 5,432,485         | 2,676,394         | 2,756,091         | 21,977         | 47           |
| Eastern       | 2,917,039         | 1,434,021         | 1,483,018         | 6,795          | 52           |
| Central       | 2,859,821         | 1,390,985         | 1,468,836         | 5,289          | 129          |
| Northern      | 2,310,943         | 1,141,708         | 1,169,235         | 1,808          | 55           |
| Western       | 2,057,225         | 1,043,400         | 1,013,825         | 8,029          | 91           |
| Volta         | 1,649,523         | 786,112           | 863,411           | 5,744          | 103          |
| Upper East    | 1,301,221         | 631,258           | 669,963           | 1,611          | 4            |
| Bono          | 1,208,965         | 596,841           | 612,124           | 2,214          | 13           |
| Bono East     | 1,203,306         | 603,095           | 600,211           | 2,817          | 0            |
| Upper West    | 904,695           | 441,799           | 462,896           | 805            | 12           |
| Western North | 880,855           | 451,911           | 428,944           | 1,094          | 0            |
| Oti           | 747,227           | 377,380           | 369,847           | 890            | 0            |
| North East    | 658,903           | 322,139           | 336,764           | 318            | 0            |
| Savannah      | 649,627           | 325,973           | 323,654           | 291            | 0            |
| Ahafo         | 564,536           | 285,251           | 279,285           | 1,116          | 0            |

**Supplementary Table 3: Demographic characteristics of community study participants (1002/1123)**

| <b>Characteristic</b>           | <b>N = 1,002<sup>1</sup></b> |
|---------------------------------|------------------------------|
| <b>Sex</b>                      | <b>n (%)</b>                 |
| Female                          | 418 (43%)                    |
| Male                            | 561 (57%)                    |
| Missing                         | 23                           |
| <b>Age group (%)</b>            | <b>n (%)</b>                 |
| 0-20 Years                      | 104 (11%)                    |
| 21-40 Years                     | 507 (54%)                    |
| 41-60 Years                     | 230 (24%)                    |
| 61-100 Years                    | 106 (11%)                    |
| Missing                         | 55                           |
| <b>Sampling Month, Year (%)</b> | <b>n (%)</b>                 |
| Mar, 2020                       | 4 (0.4%)                     |
| May, 2020                       | 27 (2.7%)                    |
| Jun, 2020                       | 9 (0.9%)                     |
| Jul, 2020                       | 46 (4.6%)                    |
| Aug, 2020                       | 27 (2.7%)                    |
| Sep, 2020                       | 18 (1.8%)                    |
| Oct, 2020                       | 13 (1.3%)                    |
| Nov, 2020                       | 29 (2.9%)                    |
| Dec, 2020                       | 27 (2.7%)                    |
| Jan, 2021                       | 141 (14%)                    |
| Feb, 2021                       | 70 (7.0%)                    |
| Mar, 2021                       | 31 (3.1%)                    |
| Apr, 2021                       | 60 (6.0%)                    |
| May, 2021                       | 96 (9.6%)                    |
| Jun, 2021                       | 69 (6.9%)                    |
| Jul, 2021                       | 268 (27%)                    |
| Aug, 2021                       | 62 (6.2%)                    |
| Sep, 2021                       | 5 (0.5%)                     |
| <b>Sampling region</b>          | <b>n (%)</b>                 |
| Ashanti                         | 47 (4.7%)                    |
| Bono East                       | 13 (1.3%)                    |
| Central                         | 133 (13%)                    |
| Eastern                         | 52 (5.2%)                    |
| Greater Accra                   | 490 (49%)                    |
| Northern                        | 55 (5.5%)                    |
| Upper East                      | 4 (0.4%)                     |
| Upper West                      | 12 (1.2%)                    |
| Volta                           | 103 (10%)                    |
| Western                         | 93 (9.3%)                    |

<sup>1</sup> n (%)

**Supplementary Table 4: Frequency of SARS-CoV-2 variants among travellers arriving in Ghana from other countries in January, March, and June (n=121).**

| Variant           | Mar, 2020 |     | Jan, 2021 |     | Mar, 2021 |     | Jun, 2021 |     | Total      |     |
|-------------------|-----------|-----|-----------|-----|-----------|-----|-----------|-----|------------|-----|
|                   | n         | %   | n         | %   | n         | %   | n         | %   | n          | %   |
| B.1.1.7 (Alpha)   |           |     | 28        | 42% | 19        | 61% |           |     | 47         | 39% |
| B.1               | 5         | 33% | 5         | 8%  |           |     |           |     | 10         | 8%  |
| B.1.1             | 2         | 13% | 7         | 11% |           |     |           |     | 9          | 7%  |
| B.1.617.2 (Delta) |           |     |           |     |           |     | 8         | 89% | 8          | 7%  |
| B.1.351 (Beta)    |           |     | 3         | 5%  | 4         | 13% |           |     | 7          | 6%  |
| B.1.525 (Eta)     |           |     | 5         | 8%  |           |     |           |     | 5          | 4%  |
| A.11              | 4         | 27% |           |     |           |     |           |     | 4          | 3%  |
| B.1.1.318         |           |     |           |     | 3         | 10% | 1         | 11% | 4          | 3%  |
| R.1               |           |     | 3         | 5%  |           |     |           |     | 3          | 2%  |
| A.23.1            |           |     | 1         | 2%  | 1         | 3%  |           |     | 2          | 2%  |
| B.1.177           |           |     | 2         | 3%  |           |     |           |     | 2          | 2%  |
| B.1.177.86        |           |     | 2         | 3%  |           |     |           |     | 2          | 2%  |
| B.1.526 (Iota)    |           |     |           |     | 2         | 6%  |           |     | 2          | 2%  |
| L.3               |           |     | 2         | 3%  |           |     |           |     | 2          | 2%  |
| A                 | 1         | 7%  |           |     |           |     |           |     | 1          | 1%  |
| A.21              |           |     | 1         | 2%  |           |     |           |     | 1          | 1%  |
| B                 | 1         | 7%  |           |     |           |     |           |     | 1          | 1%  |
| B.1.1.10          |           |     | 1         | 2%  |           |     |           |     | 1          | 1%  |
| B.1.1.409         |           |     | 1         | 2%  |           |     |           |     | 1          | 1%  |
| B.1.1.420         |           |     | 1         | 2%  |           |     |           |     | 1          | 1%  |
| B.1.177.7         |           |     | 1         | 2%  |           |     |           |     | 1          | 1%  |
| B.1.177.81        |           |     | 1         | 2%  |           |     |           |     | 1          | 1%  |
| B.1.220           | 1         | 7%  |           |     |           |     |           |     | 1          | 1%  |
| B.1.243           |           |     | 1         | 2%  |           |     |           |     | 1          | 1%  |
| B.1.36.8          |           |     | 1         | 2%  |           |     |           |     | 1          | 1%  |
| B.1.617.1 (Kappa) |           |     |           |     | 1         | 3%  |           |     | 1          | 1%  |
| B.40              | 1         | 7%  |           |     |           |     |           |     | 1          | 1%  |
| C.36.3            |           |     |           |     | 1         | 3%  |           |     | 1          | 1%  |
| <b>Total</b>      | <b>15</b> |     | <b>66</b> |     | <b>31</b> |     | <b>9</b>  |     | <b>121</b> |     |

**Supplementary Table 5: The proportion of Delta sub-lineages (AY) Variants in Ghana.**

| <b>Delta Plus Variant</b> | <b>Count</b> | <b>Percentage</b> |
|---------------------------|--------------|-------------------|
| AY.39                     | 174          | 87%               |
| AY.37                     | 15           | 8%                |
| AY.5                      | 5            | 3%                |
| AY.36                     | 2            | 1%                |
| AY.26                     | 1            | 1%                |
| AY.30                     | 1            | 1%                |
| AY.33                     | 1            | 1%                |
| AY.40                     | 1            | 1%                |
| Total                     | 200          |                   |
